# Supplementary material
Source: PubMed Central journal article supplement (PMC8272444)
Supplement: 10943_2021_1327_MOESM1_ESM.pdf [file 10943_2021_1327_MOESM1_ESM.pdf]

# Covid-19 study

Thank you for participating in current research. We hope your valuable input will help us to conduct this research. This study is initiated by the scholars from Indonesia and Pakistan, if you have any questions please write to me at [muhhammad.saud@gmail.com](mailto:muhhammad.saud@gmail.com)

We want to hear your opinion about the corona-virus situation. Please fill this quick survey and let us know your thoughts (your answers will be anonymous).

Muhammad Saud

\* Required

1. I hope to keep my beloved one safe from coronavirus infections \*

*Mark only one oval.*

|                    |                       |                       |                       |                       |                       |                 |
|--------------------|-----------------------|-----------------------|-----------------------|-----------------------|-----------------------|-----------------|
|                    | 1                     | 2                     | 3                     | 4                     | 5                     |                 |
| Strongly Disagreed | <input type="radio"/> | Strongly agreed |

2. I am prepared well to face the situation \*

*Mark only one oval.*

|                    |                       |                       |                       |                       |                       |                 |
|--------------------|-----------------------|-----------------------|-----------------------|-----------------------|-----------------------|-----------------|
|                    | 1                     | 2                     | 3                     | 4                     | 5                     |                 |
| Strongly Disagreed | <input type="radio"/> | Strongly agreed |

3. I take a positive attitude toward myself in coronavirus chaos. \*

*Mark only one oval.*

|                    |                       |                       |                       |                       |                       |                 |
|--------------------|-----------------------|-----------------------|-----------------------|-----------------------|-----------------------|-----------------|
|                    | 1                     | 2                     | 3                     | 4                     | 5                     |                 |
| Strongly Disagreed | <input type="radio"/> | Strongly agreed |

4. I am watching movies, and playing my favorite songs while staying at home \*

*Mark only one oval.*

|                    |                       |                       |                       |                       |                       |                 |
|--------------------|-----------------------|-----------------------|-----------------------|-----------------------|-----------------------|-----------------|
|                    | 1                     | 2                     | 3                     | 4                     | 5                     |                 |
| Strongly Disagreed | <input type="radio"/> | Strongly agreed |

5. Watching movies make me feel good \*

*Mark only one oval.*

|                    |                       |                       |                       |                       |                       |                 |
|--------------------|-----------------------|-----------------------|-----------------------|-----------------------|-----------------------|-----------------|
|                    | 1                     | 2                     | 3                     | 4                     | 5                     |                 |
| Strongly Disagreed | <input type="radio"/> | Strongly agreed |

6. Staying in touch with my family, friends and colleagues make me feeling better \*

Mark only one oval.

|                    |                       |                       |                       |                       |                       |                 |
|--------------------|-----------------------|-----------------------|-----------------------|-----------------------|-----------------------|-----------------|
|                    | 1                     | 2                     | 3                     | 4                     | 5                     |                 |
| Strongly Disagreed | <input type="radio"/> | Strongly agreed |

Are you somehow effected?

Your opinion about facing corona virus patient \* in case you face one\*

7. I can visit to patient who is currently recovered from coronavirus \*

Mark only one oval.

|                    |                       |                       |                       |                       |                       |                 |
|--------------------|-----------------------|-----------------------|-----------------------|-----------------------|-----------------------|-----------------|
|                    | 1                     | 2                     | 3                     | 4                     | 5                     |                 |
| Strongly Disagreed | <input type="radio"/> | Strongly agreed |

8. I have sympathies for coronavirus patient, but I don't want to meet or help them \*

Mark only one oval.

|                    |                       |                       |                       |                       |                       |                 |
|--------------------|-----------------------|-----------------------|-----------------------|-----------------------|-----------------------|-----------------|
|                    | 1                     | 2                     | 3                     | 4                     | 5                     |                 |
| Strongly Disagreed | <input type="radio"/> | Strongly agreed |

9. I can volunteer myself to take care of suspected infectious \*

*Mark only one oval.*

|                    | 1                     | 2                     | 3                     | 4                     | 5                     |                 |
|--------------------|-----------------------|-----------------------|-----------------------|-----------------------|-----------------------|-----------------|
| Strongly Disagreed | <input type="radio"/> | Strongly agreed |

10. I will be friendly and compassionate to coronavirus patient if I met them \*

*Mark only one oval.*

|                    | 1                     | 2                     | 3                     | 4                     | 5                     |                 |
|--------------------|-----------------------|-----------------------|-----------------------|-----------------------|-----------------------|-----------------|
| Strongly Disagreed | <input type="radio"/> | Strongly agreed |

11. I feel everyone having influenza must have coronavirus infections \*

*Mark only one oval.*

|                    | 1                     | 2                     | 3                     | 4                     | 5                     |                 |
|--------------------|-----------------------|-----------------------|-----------------------|-----------------------|-----------------------|-----------------|
| Strongly Disagreed | <input type="radio"/> | Strongly agreed |

12. I feel that no body is caring the society except me

\*

Mark only one oval.

|                    |                       |                       |                       |                       |                       |                 |
|--------------------|-----------------------|-----------------------|-----------------------|-----------------------|-----------------------|-----------------|
|                    | 1                     | 2                     | 3                     | 4                     | 5                     |                 |
| Strongly Disagreed | <input type="radio"/> | Strongly agreed |

How your position to get rid off?

Your opinion about situational input

13. i am social hygiene (viral) situation than others \*

Mark only one oval.

|                    |                       |                       |                       |                       |                       |                 |
|--------------------|-----------------------|-----------------------|-----------------------|-----------------------|-----------------------|-----------------|
|                    | 1                     | 2                     | 3                     | 4                     | 5                     |                 |
| Strongly Disagreed | <input type="radio"/> | Strongly agreed |

14. I feel in coronavirus outbreak, we must shut all activities \*

Mark only one oval.

|                    |                       |                       |                       |                       |                       |                 |
|--------------------|-----------------------|-----------------------|-----------------------|-----------------------|-----------------------|-----------------|
|                    | 1                     | 2                     | 3                     | 4                     | 5                     |                 |
| Strongly Disagreed | <input type="radio"/> | Strongly agreed |

15. I feel coronavirus outbreak may infect anyone \*

*Mark only one oval.*

1      2      3      4      5

---

Strongly Disagreed      Strongly agreed

---

16. I feel we have no control on coronavirus situation \*

*Mark only one oval.*

1      2      3      4      5

---

Strongly Disagreed      Strongly agreed

---

17. I feel we can cure coronavirus from hygiene practice only \*

*Mark only one oval.*

1      2      3      4      5

---

Strongly Disagreed      Strongly agreed

---

18. I feel we can overcome the coronavirus situation quickly \*

Mark only one oval.

1      2      3      4      5

---

Strongly Disagreed                  Strongly agreed

---

**Do you have any solution?**

Your opinion about solution

19. Only passing time can help us overcoming coronavirus \*

Mark only one oval.

1      2      3      4      5

---

Strongly Disagreed                  Strongly agreed

---

20. I feel after some time the current situation will be ok \*

Mark only one oval.

1      2      3      4      5

---

Strongly Disagreed                  Strongly agreed

---

21. I feel after initial isolation, everyone will be free from coronavirus \*

*Mark only one oval.*

|                    | 1                     | 2                     | 3                     | 4                     | 5                     |                 |
|--------------------|-----------------------|-----------------------|-----------------------|-----------------------|-----------------------|-----------------|
| Strongly Disagreed | <input type="radio"/> | Strongly agreed |

22. I feel I should stay away from others \*

*Mark only one oval.*

|                    | 1                     | 2                     | 3                     | 4                     | 5                     |                 |
|--------------------|-----------------------|-----------------------|-----------------------|-----------------------|-----------------------|-----------------|
| Strongly Disagreed | <input type="radio"/> | Strongly agreed |

23. I feel I should not participate in group activities \*

*Mark only one oval.*

|                    | 1                     | 2                     | 3                     | 4                     | 5                     |                 |
|--------------------|-----------------------|-----------------------|-----------------------|-----------------------|-----------------------|-----------------|
| Strongly Disagreed | <input type="radio"/> | Strongly agreed |



24. I only meet trusted people \*

*Mark only one oval.*

|                    |                       |                       |                       |                       |                       |                 |
|--------------------|-----------------------|-----------------------|-----------------------|-----------------------|-----------------------|-----------------|
|                    | 1                     | 2                     | 3                     | 4                     | 5                     |                 |
| Strongly Disagreed | <input type="radio"/> | Strongly agreed |

25. I feel i should not meet strangers \*

*Mark only one oval.*

|                    |                       |                       |                       |                       |                       |                 |
|--------------------|-----------------------|-----------------------|-----------------------|-----------------------|-----------------------|-----------------|
|                    | 1                     | 2                     | 3                     | 4                     | 5                     |                 |
| Strongly Disagreed | <input type="radio"/> | Strongly agreed |

26. I feel i should not meet people outside my social circle \*

*Mark only one oval.*

|                    |                       |                       |                       |                       |                       |                 |
|--------------------|-----------------------|-----------------------|-----------------------|-----------------------|-----------------------|-----------------|
|                    | 1                     | 2                     | 3                     | 4                     | 5                     |                 |
| Strongly Disagreed | <input type="radio"/> | Strongly agreed |

27. I feel i should not meet people outside my social circle \*

*Mark only one oval.*

|                    | 1                     | 2                     | 3                     | 4                     | 5                     |                 |
|--------------------|-----------------------|-----------------------|-----------------------|-----------------------|-----------------------|-----------------|
| Strongly Disagreed | <input type="radio"/> | Strongly agreed |

28. I convey my concerns to my friends and family to keep distance from others \*

*Mark only one oval.*

|                    | 1                     | 2                     | 3                     | 4                     | 5                     |                 |
|--------------------|-----------------------|-----------------------|-----------------------|-----------------------|-----------------------|-----------------|
| Strongly Disagreed | <input type="radio"/> | Strongly agreed |

29. I do not trust others because the matter is related to my life or death \*

*Mark only one oval.*

|                    | 1                     | 2                     | 3                     | 4                     | 5                     |                 |
|--------------------|-----------------------|-----------------------|-----------------------|-----------------------|-----------------------|-----------------|
| Strongly Disagreed | <input type="radio"/> | Strongly agreed |

30. One should not be close to anyone these days \*

*Mark only one oval.*

1      2      3      4      5

---

Strongly Disagreed      Strongly agreed

---

31. When I hear some death news, coronavirus infection is the first point comes to my mind \*

*Mark only one oval.*

1      2      3      4      5

---

Strongly Disagreed      Strongly agreed

---

32. Your Email & Full Name \*

---

---

This content is neither created nor endorsed by Google.

Google Forms
